# Supplementary material for: Geometry effect on the photocatalytic properties of LCD 3D-printed TiO2-based nanocomposites
Source: Research Square preprint supplement (doi:10.21203/rs.3.rs-7232268/v1), 2025-09-17
Supplement: Supplementary file 1 [file f73c998c6d1ff70081c298f2.docx]

**SUPPLEMENTARY INFORMATION**

**Geometry effect on the photocatalytic properties of LCD 3D-printed TiO2-based nanocomposites**

Libera Vitiello1,†,*, Giuseppe Proietto Salanitri2,†, Paolo Maria Riccobene1, Maria Grazia Pia Musumeci3, Roberto Fiorenza3, Sabrina Carola Carroccio1

*1CNR-IPCB Institute for Polymers, Composites and Biomaterials CNR-IPCB, Via Paolo Gaifami 18, Catania 95126, Italy*

*2Department of Industrial Chemistry “Toso Montanari”, University of Bologna, Via Piero Gobetti 85, 40129 Bologna, Italy*

*3Department of Chemical Sciences, University of Catania, V.le A. Doria 6, Catania 95125, Italy*

*Corresponding author: libera.vitiello

@cnr.it (L. Vitiello)

† These authors contributed equally

**Table of contents:**

- *Figures S1 – 5*
- *Tables S1 – 3*


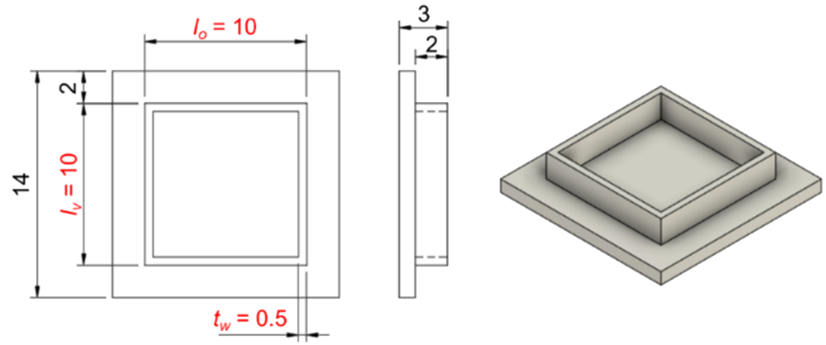


**Fig. S1.** Schematic representation of the 3D-printed model designed for the optimization of printing parameters. All dimensions are in millimetres.


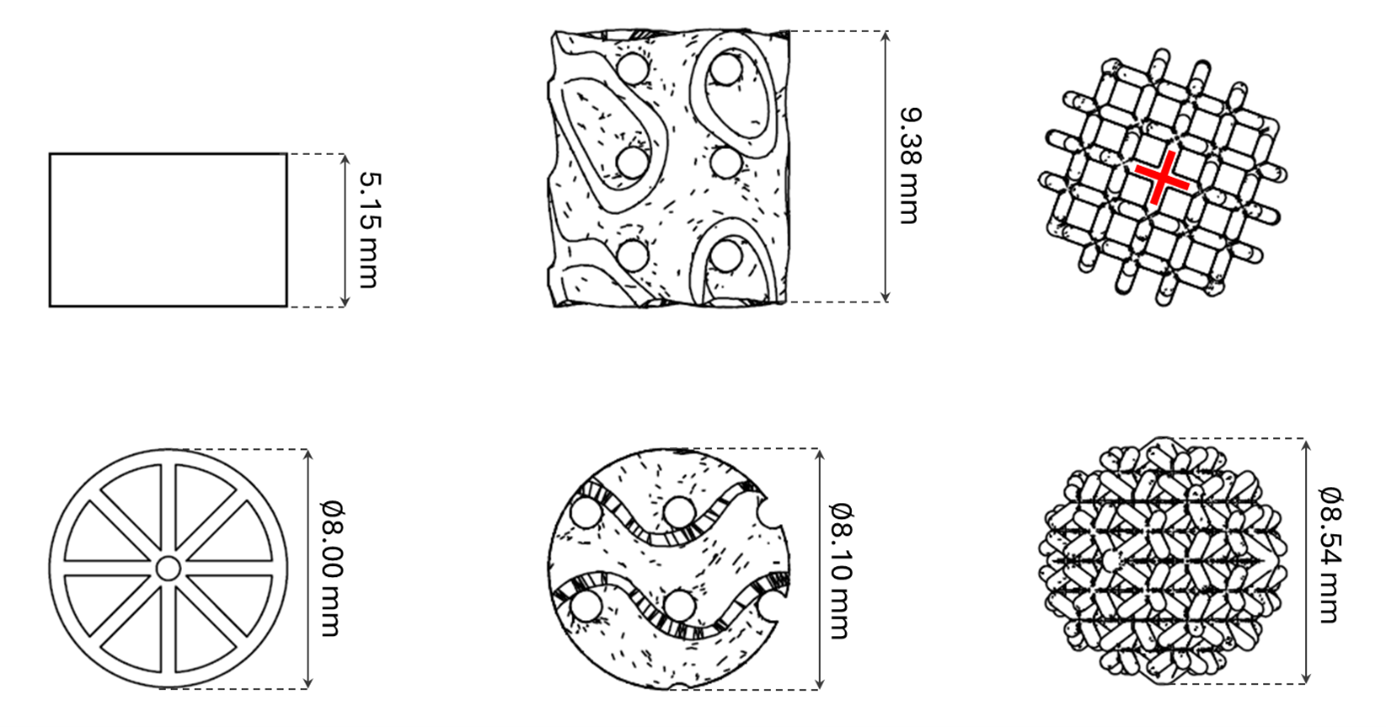


**Fig. S2.** Dimensions of the three-dimensional macroscopic structures: wheel, gyroid and lattice.


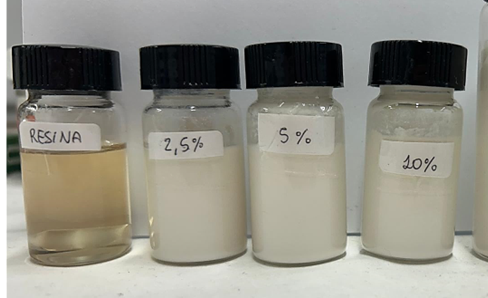


**Fig. S3.** Clear UV resin loaded with different TiO2 NPs contents after 60 hours after preparation.


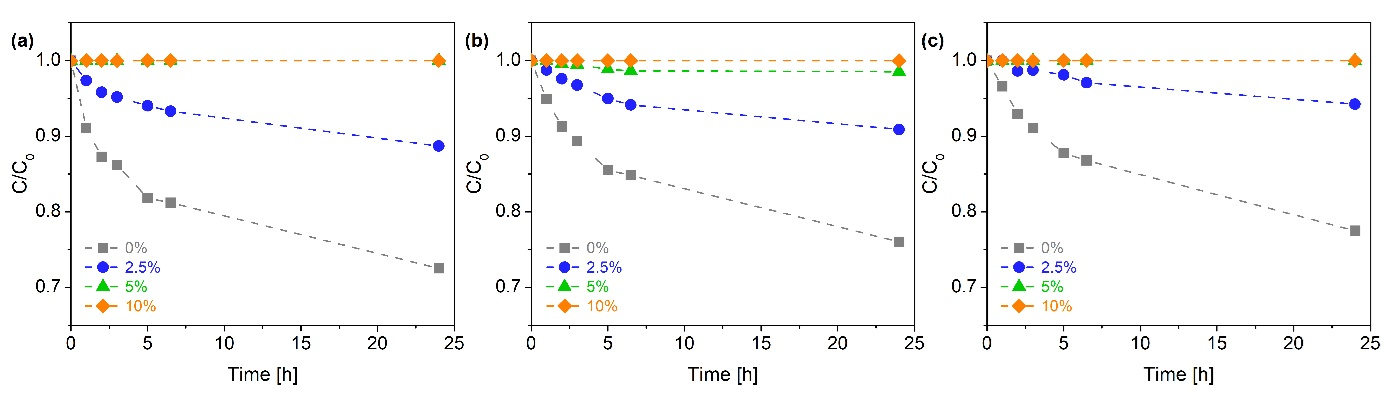


**Fig. S4.** Methylene blue concentration variation in dark conditions for samples containing 0%, 2.5%, 5%, and 10% TiO₂: (a) gyroid, (b) wheel, and (c) lattice. The dashed lines are guides for the eye.


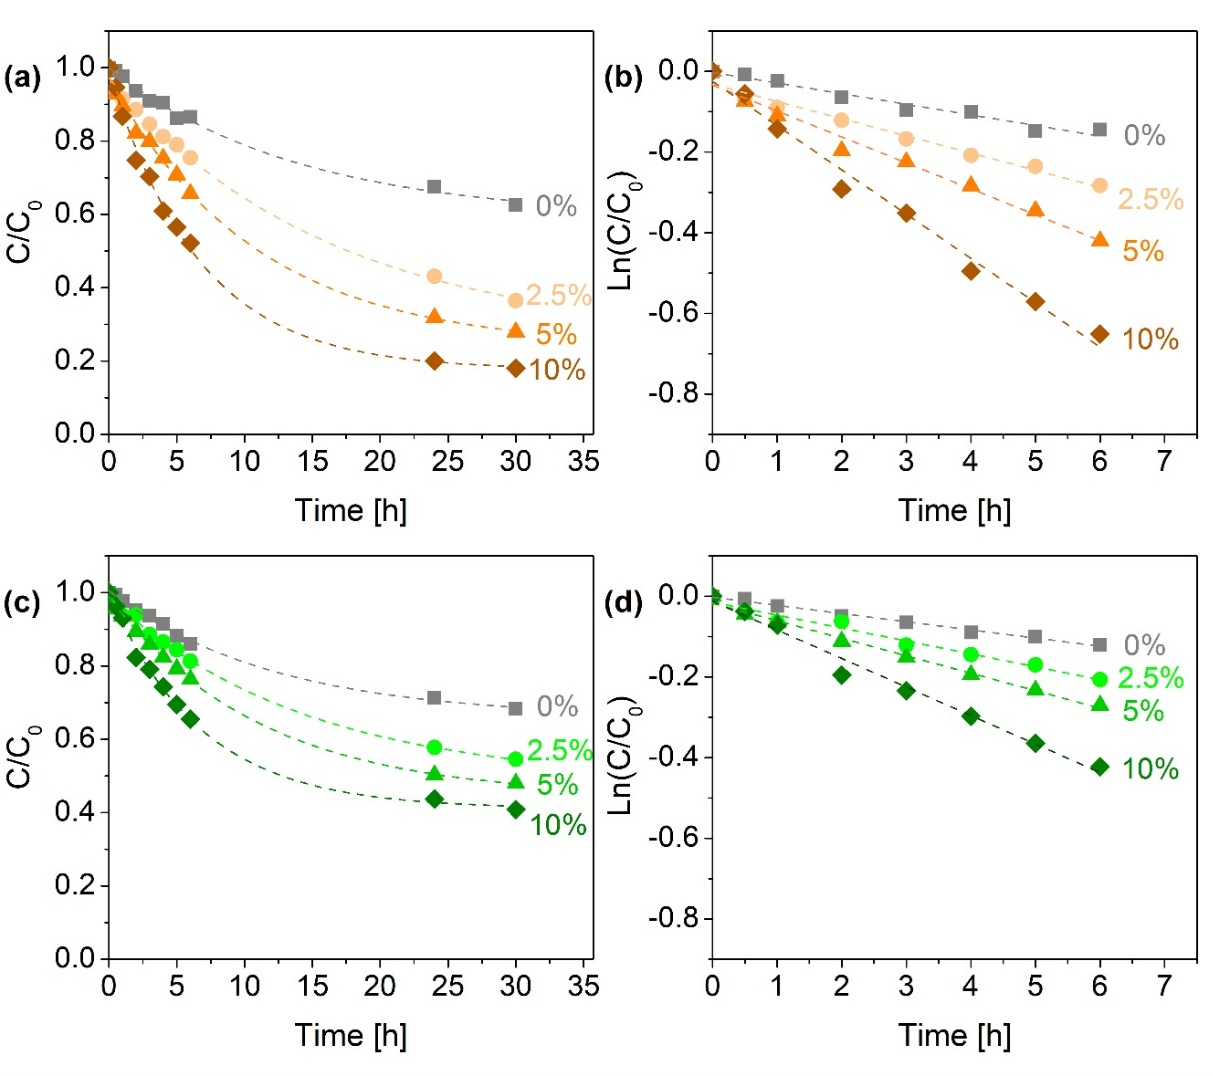


**Fig. S5.** Photocatalytic degradation of methylene blue over time for the lattice (a) and wheel (c) samples with 0%, 2.5%, 5%, and 10% TiO₂; linear fit of the concentration variation during the first 6 hours of testing for the lattice (b) and wheel (d) samples. The dashed lines are guides for the eye.

**Table S1.** Temperature at 5% weight loss (T₅%), principal degradation peak temperature (Tₚₑₐₖ), and residue at 800 °C of the 3D-printed nanocomposites with different TiO₂ content.

| **TiO2 [wt.%]** | **T5% [°C]** | **Tpeak [°C]** | **Residue [%]** |
| --- | --- | --- | --- |
| 0 | 212 | 431 | 0.0 |
| 2.5 | 273 | 437 | 2.7 |
| 5 | 271 | 438 | 5.3 |
| 10 | 240 | 444 | 10.5 |

**Table S2.** EDX elemental mapping data for C, O and Ti in 3D-printed model sample loaded with different TiO2 contents.

| **TiO2 [wt.%]** | **Weight Concentration [%]** | | |
| --- | --- | --- | --- |
| C [%] | O [%] | Ti [%] |
| 0 | 90 | 10 |  |
| 2.5 | 49 | 36 | 15 |
| 5 | 43 | 39 | 18 |
| 10 | 32 | 37 | 31 |

**Table S3.** Printing parameters on Sonic Mini 8K for Phrozen Aqua 3D Printer Resin.

| **Printing parameters** |  |
| --- | --- |
| Layer height [mm] | 0.05 |
| Bottom layer count | 15 |
| Bottom exposure time [s] | 100 |
| Transition layer count | 5 |
| Transition type | Linear |
| Waiting mode during printing | Resting time |
| Rest time after retraction [s] | 3 |
| Bottom lift distance [mm] | 6 |
| Lifting distance [mm] | 6 |
| Bottom lift speed [mm/min] | 60 |
| Lifting speed [mm/min] | 60 |
| Bottom retract speed [mm/min] | 150 |
| Retract speed [mm/min] | 150 |
